# Supplementary material for: A cell-permeable peptide-based PROTAC against the oncoprotein CREPT proficiently inhibits pancreatic cancer
Source: PubMed Central journal article supplement (PMC7069095; doi:10.7150/thno.41677), 2020-02-19
Supplement: thnov10p3708s1.pdf [file thnov10p3708s1.pdf]

## SUPPLEMENTARY INFORMATION

### **A cell-permeable peptide-based PROTAC against the oncoprotein CREPT proficiently inhibits pancreatic cancer**

Danhui Ma<sup>1</sup>, Yutian Zou<sup>1,2</sup>, Yunxiang Chu<sup>3</sup>, Zhengsheng Liu<sup>4</sup>, Gaochao Liu<sup>5</sup>, Jun Chu<sup>1</sup>, Mengdi Li<sup>1</sup>, Jiayu Wang<sup>1</sup>, Shi-yong Sun<sup>6, \*</sup>, Zhijie Chang<sup>1, \*</sup>

1. State Key Laboratory of Membrane Biology, School of Medicine, National Engineering Laboratory for Anti-tumor Therapeutics, Tsinghua University, Beijing 100084, China.

2. College of Letters and Science, University of California, Berkeley, 101 Durant Hall, Berkeley, CA 94720.

3. Department of Gastroenterology, Emergency General Hospital, Beijing 100028, China.

4. School of Pharmaceutical Sciences, Tsinghua University, Beijing 100084, China.

5. MOE Key Laboratory of Protein Sciences, Beijing Advanced Innovation Center for Structural Biology, Tsinghua-Peking Joint Center for Life Sciences, School of Life Sciences and School of Medicine, Tsinghua University, Beijing, 100084 China.

6. Department of Hematology and Medical Oncology, Emory University School of Medicine and Winship Cancer Institute, Atlanta, GA, USA.

\*Correspondence: Zhijie Chang, Ph.D. E-mail: zhijiec@mail.tsinghua.edu.cn. or Shi-yong Sun, Ph.D. E-mail: ssun@emory.edu.

#### **1. Abbreviations**

AHX, 6-aminohexanoic acid

CCK-8, cell counting kit

CCT, coiled-coil terminus

CD, circular dichroism

CL, CREPT ligand

CREPT, cell-cycle-related and expression-elevated protein in tumor

DA, degrading arm

DAPI, 4', 6-diamidino-2-phenylindole

DC<sub>50</sub>, half maximal degradation concentration

DMEM, Dulbecco's modified Eagle's medium

EDTA, ethylenediaminetetraacetic acid

FBS, fetal bovine serum

FITC, fluorescein isothiocyanate

GST, glutathione S-transferase

HPLC, high performance liquid chromatography

IHC, immunohistochemistry

IP, immunoprecipitation

K<sub>d</sub>, dissociation constant

MS, mass spectrum

MST, microscale thermophoresis

OD, optical density

PAAD, pancreatic adenocarcinoma

PBS, phosphate buffer saline

PFA, paraformaldehyde

PROTAC, proteolysis targeting chimeras  
 PRTC, a PROTAC against CREPT  
 qPCR, quantitative PCR  
 RNAPII, RNA polymerase II  
 RNAi, RNA interference  
 RPR, regulation of nuclear pre-mRNA  
 RT-PCR, reverse transcriptase PCR  
 TA, targeting arm  
 TCGA database, the cancer genome atlas database  
 TRITC, tetramethylrhodamine  
 TSA, thermal shift assay  
 VHL, von hippel-lindau

**2. Evaluation of synthesized peptides**

**1) FITC-PRTC: 5-FITC-( Ahx)-IY-(Hyp)-AL-(Ahx)-KDVLSSEKEKKLEEYKQKLARVKRRRR**

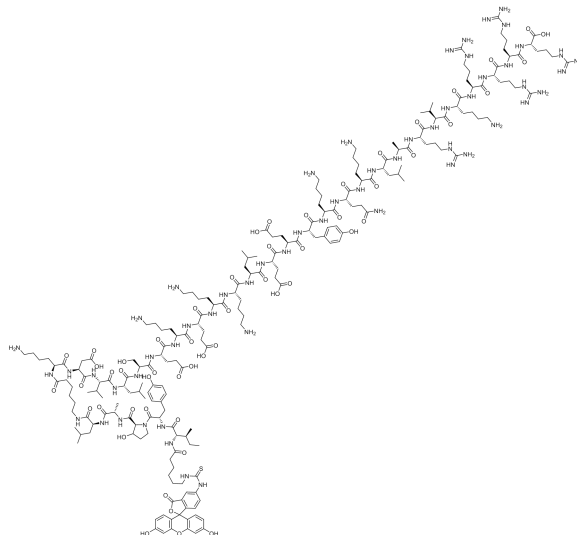

**HPLC report:**

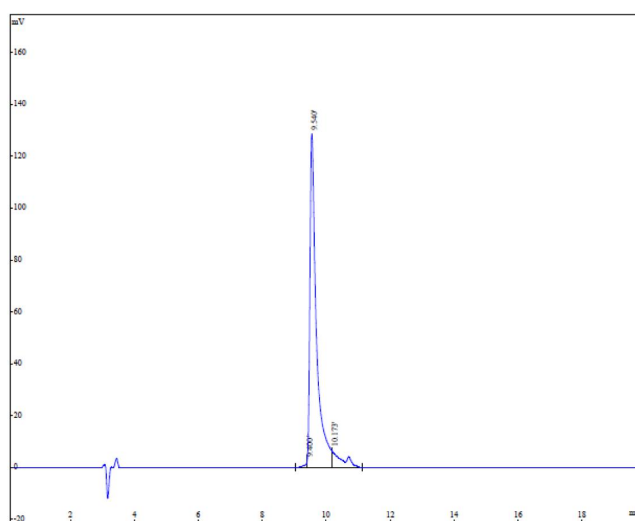

| Peak No. | Ret Time | Area    | Conc.  |
|----------|----------|---------|--------|
| 1        | 9.400    | 15367   | 0.7737 |
| 2        | 9.540    | 1819411 | 91.6   |

|                   |        |                |                 |
|-------------------|--------|----------------|-----------------|
| 3                 | 10.173 | 151321         | 7.619           |
| <b>Total:</b>     |        | <b>1986099</b> | <b>100.0000</b> |
| <b>MS report:</b> |        |                |                 |

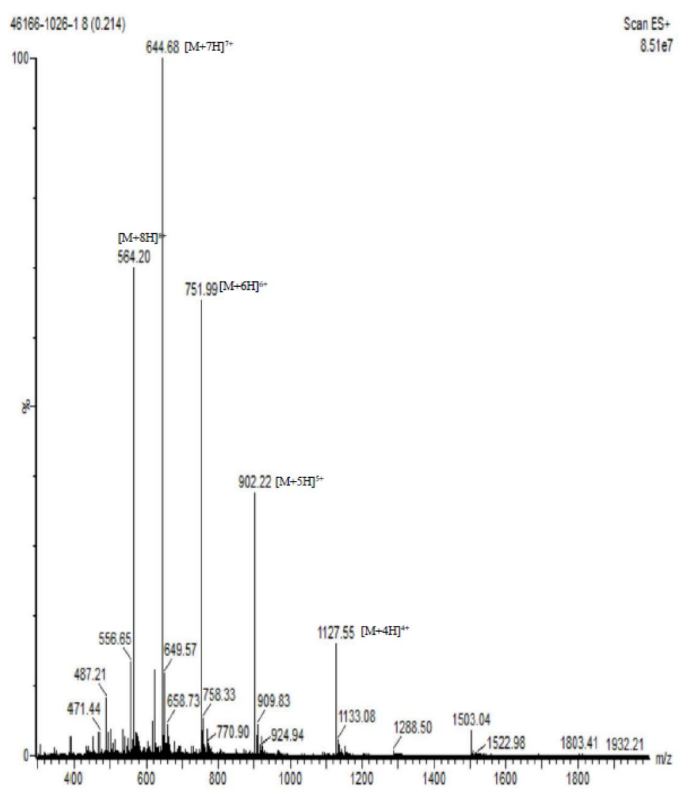

2) FITC-PRTC-m: 5-FITC-( Ahx)-IY-(Hyp)-AL-(Ahx)-KDVPSEKEKKPEEYKQKPARVKRRRR

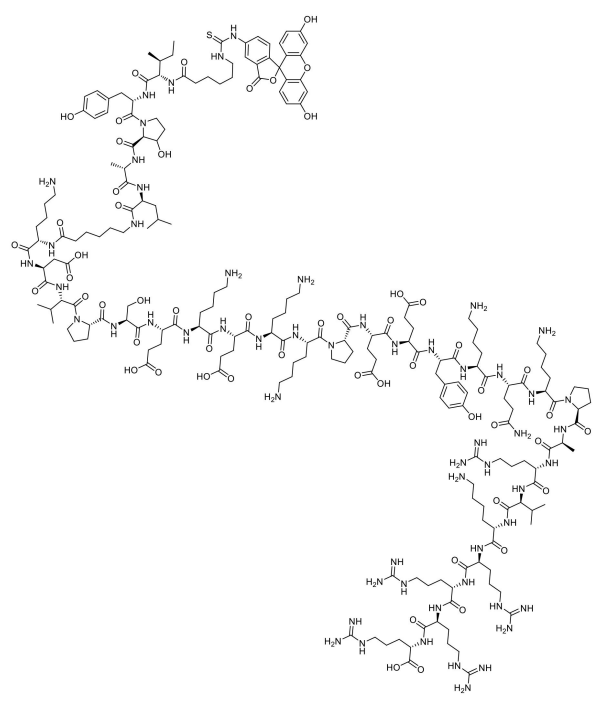

## HPLC report:

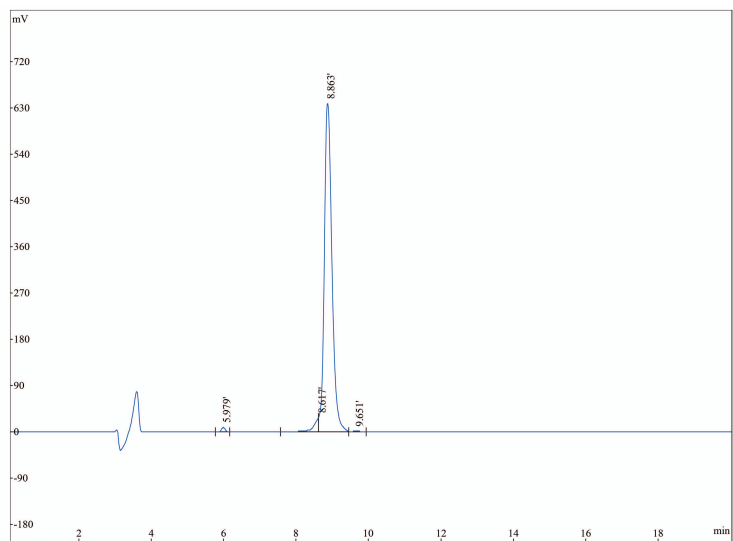

| Peak No.      | Ret Time | Area           | Conc.           |
|---------------|----------|----------------|-----------------|
| 1             | 5.979    | 66676          | 0.7223          |
| 2             | 8.617    | 286971         | 3.109           |
| 3             | 8.863    | 8838102        | 95.74           |
| 4             | 9.651    | 39716          | 0.4302          |
| <b>Total:</b> |          | <b>9231465</b> | <b>100.0000</b> |

## MS report:

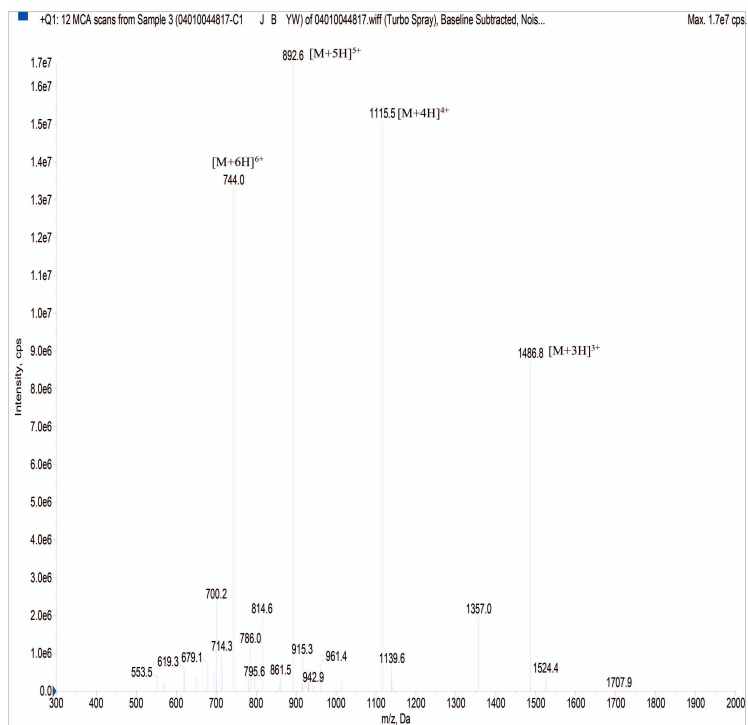

3) FITC-PRTC-v: FITC-(Ahx)-KDLVSEKEKKLEEYKQKLARVKRRRR

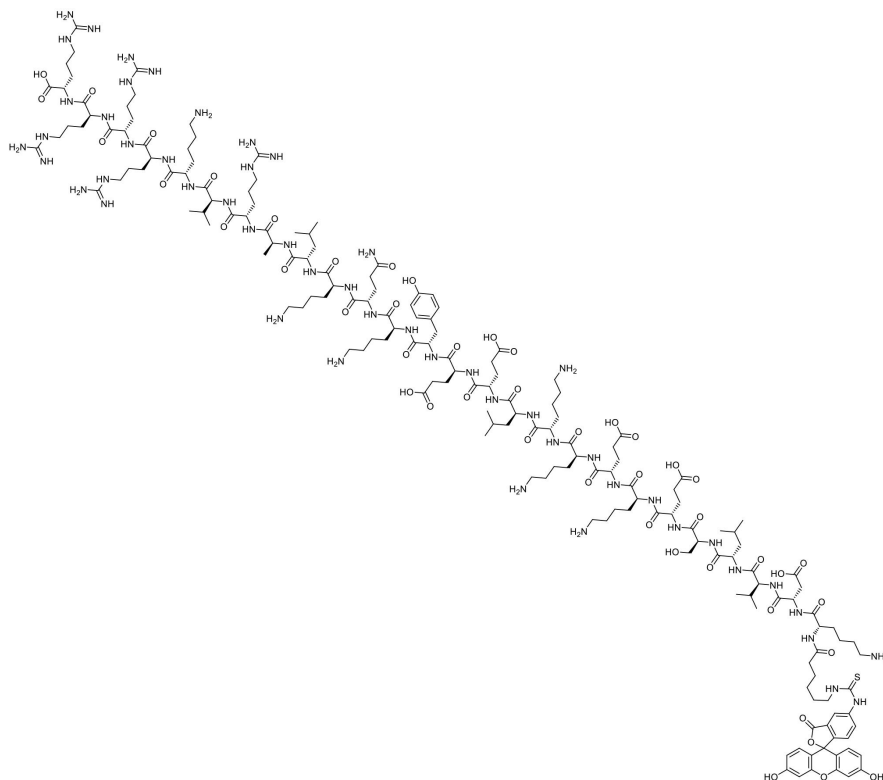

HPLC report:

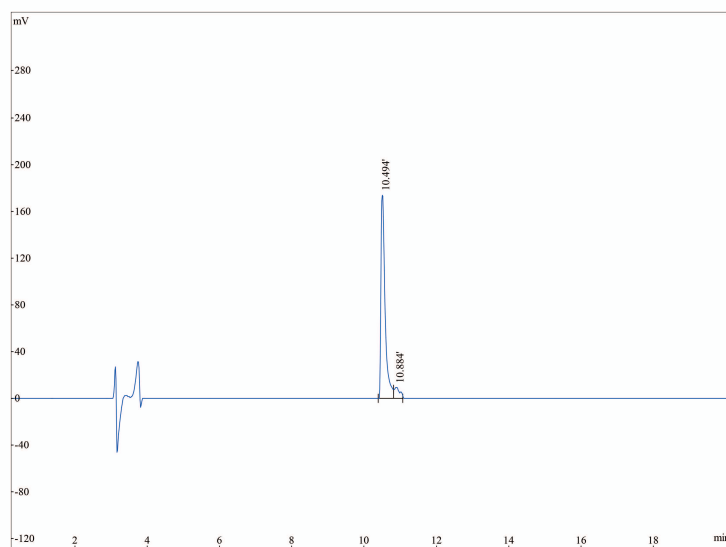

| Peak No.      | Ret Time | Area           | Conc.           |
|---------------|----------|----------------|-----------------|
| 1             | 10.494   | 1263172        | 92.73           |
| 2             | 10.884   | 99063          | 7.272           |
| <b>Total:</b> |          | <b>1362235</b> | <b>100.0000</b> |

**MS report:**

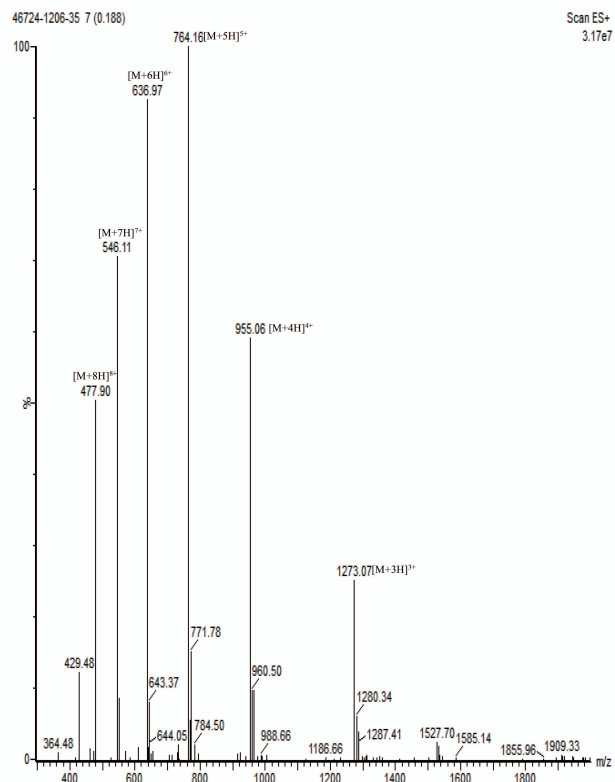

**4) FITC-PRTC-r : FITC-( Ahx)-IY-(Hyp)-AL-(AHX)-KDVLSSEKKEKKLEEYKQKLARV**

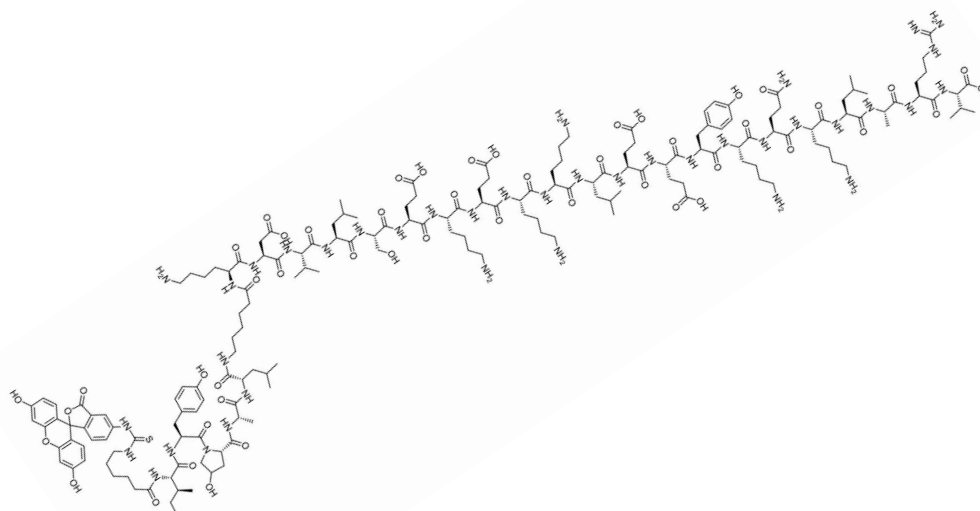

## HPLC report:

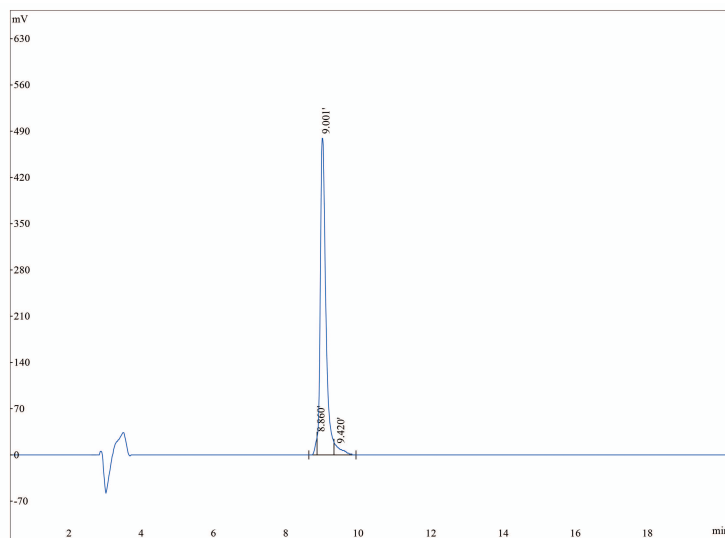

| Peak No.      | Ret Time | Area           | Conc.      |
|---------------|----------|----------------|------------|
| 1             | 8.860    | 101984         | 2.052      |
| 2             | 9.001    | 4647112        | 93.49      |
| 3             | 9.420    | 221760         | 4.461      |
| <b>Total:</b> |          | <b>4970856</b> | <b>100</b> |

## MS report:

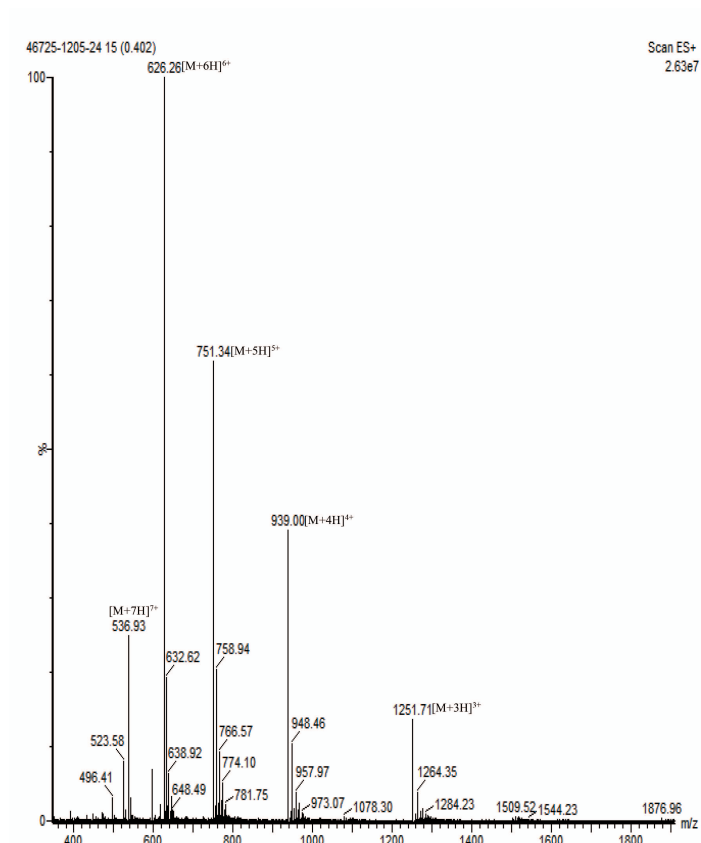

### 3. Supplemental table

**Table S1. Analytical data of synthesized peptides**

| Entry       | Chemical formula                                                    | Purity | MS (calculated) | MS (found) |
|-------------|---------------------------------------------------------------------|--------|-----------------|------------|
| FITC-PRTC   | C <sub>206</sub> H <sub>333</sub> N <sub>57</sub> O <sub>54</sub> S | 91.60% | 4504.26         | 4505.76    |
| FITC-PRTC-m | C <sub>203</sub> H <sub>321</sub> N <sub>57</sub> O <sub>54</sub> S | 95.74% | 4456.14         | 4458.00    |
| FITC-PRTC-v | C <sub>171</sub> H <sub>279</sub> N <sub>51</sub> O <sub>46</sub> S | 92.73% | 3817.51         | 3815.80    |
| FITC-PRTC-r | C <sub>176</sub> H <sub>273</sub> N <sub>39</sub> O <sub>49</sub> S | 93.49% | 3751.46         | 3751.56    |

### 4. Supplemental figures and figure legends

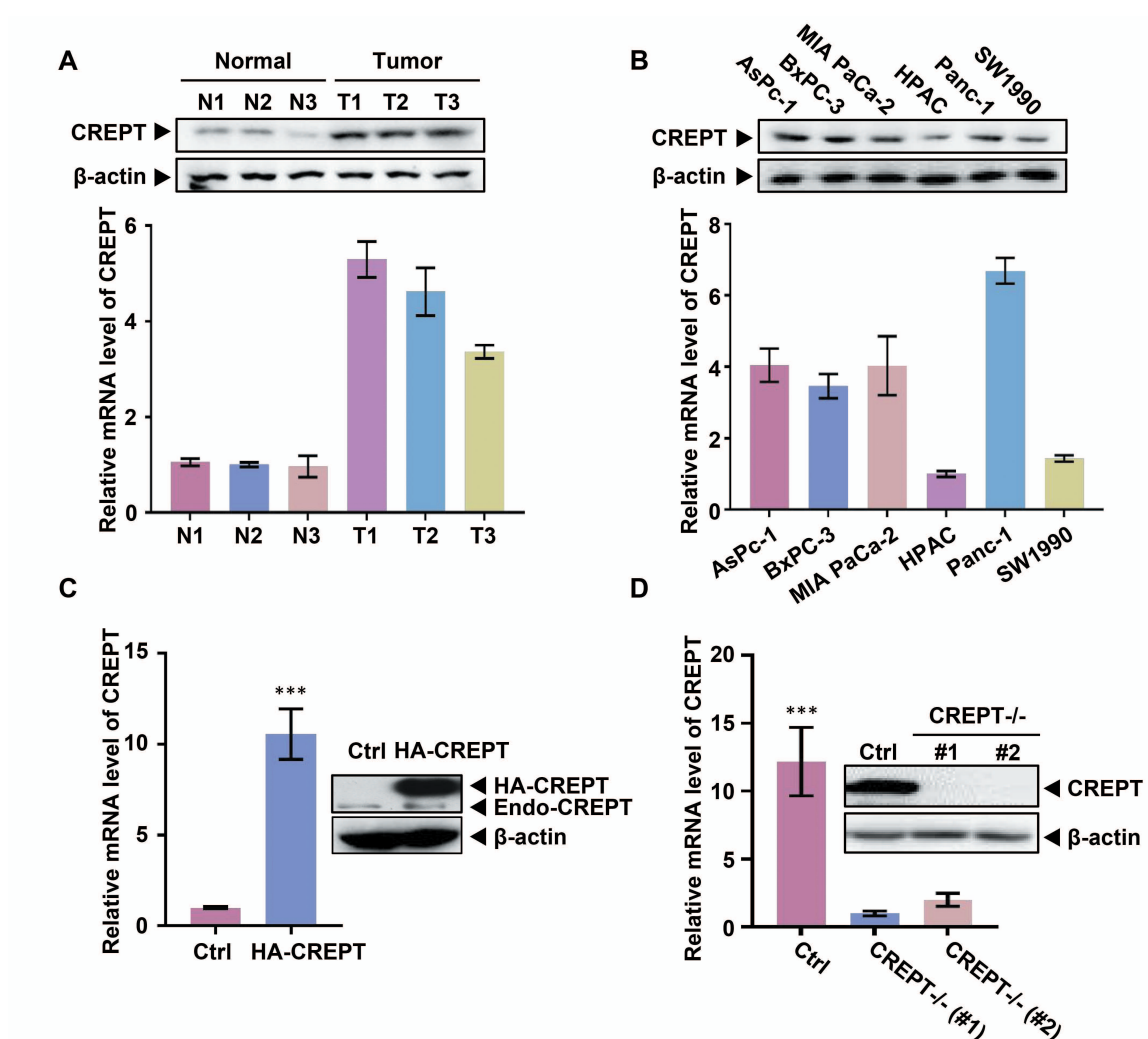

**Figure S1. Overexpression of CREPT in pancreatic cancer promotes cell proliferation and tumorigenesis. (A)** CREPT protein and mRNA level of mouse normal pancreatic tissues and K-ras/p53-driven pancreatic cancer tissues. N1, N2, N3 are wild type pancreatic tissues. T1, T2, T3 are tumors from KPC mouse model. **(B)** Western blot and quantitative PCR analysis of six pancreatic cell lines. **(C-D)** Identification of CREPT overexpression and CREPT deletion cell lines.



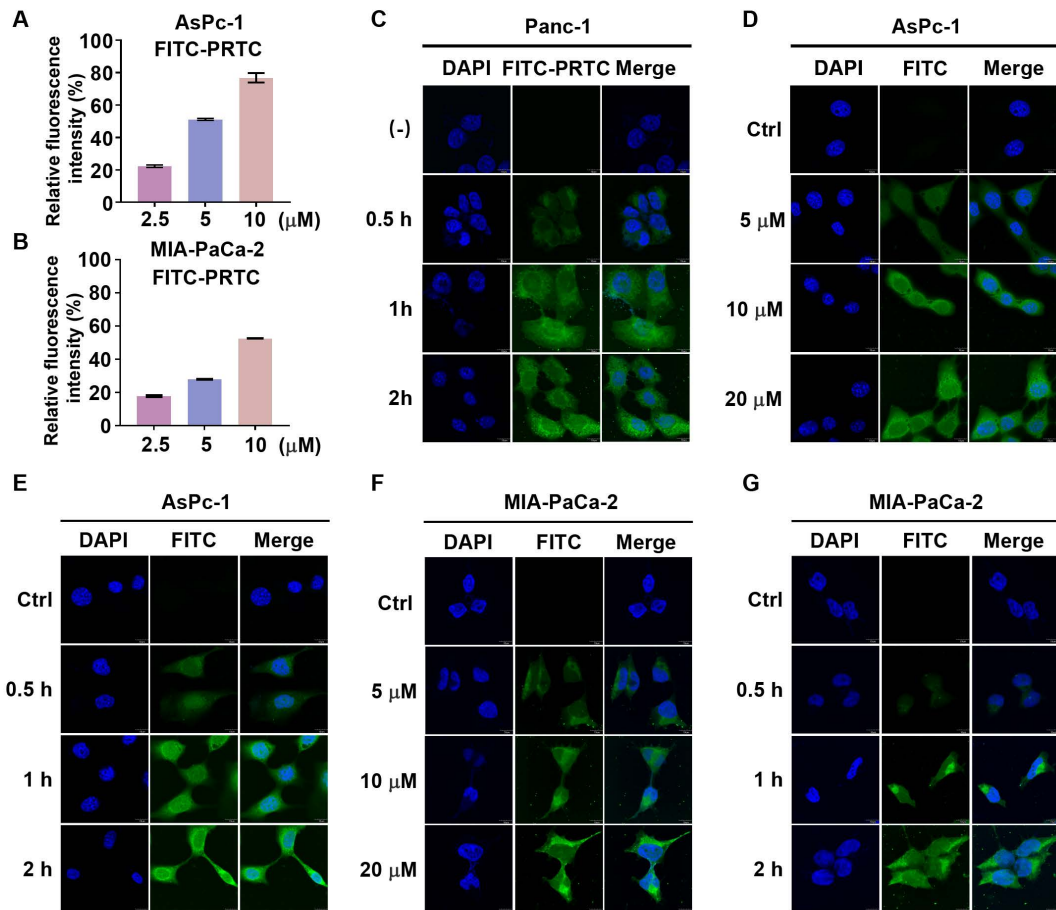

**Figure S2. Identification of the permeability of PRTC in pancreatic cancer cells. (A)** Quantification of cellular uptake of AsPc-1 cells treated with different concentrations of FITC-PRTC. **(B)** Quantification of cellular uptake of MIA PaCa-2 cells treated with different concentrations of FITC-PRTC. **(C)** Confocal microscope images of Panc-1 cells treated with 10 μM FITC-PRTC at different time points. Scale bars, 10 μm. **(D)** Confocal microscope images of AsPc-1 cells treated with different concentrations of FITC-PRTC. Scale bars, 10 μm. **(E)** Confocal microscope images of AsPc-1 cells treated with 10 μM FITC-PRTC at different time points. Scale bars, 10 μm. **(F)** Confocal microscope images of MIA PaCa-2 cells treated with different concentrations of FITC-PRTC. Scale bars, 10 μm. **(G)** Confocal microscope images of MIA PaCa-2 cells treated with 10 μM FITC-PRTC at different time points. Scale bars, 10 μm.

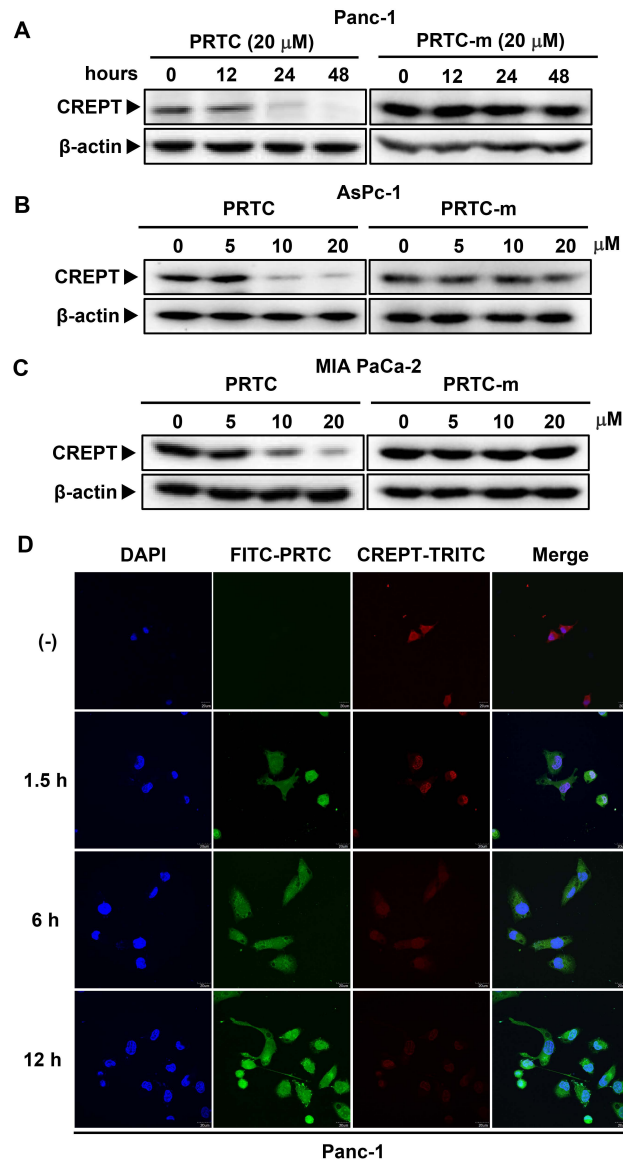

**Figure S3. PRTC induces CREPT degradation.** (A) Immunoblot of CREPT exposed to 20  $\mu$ M PRTC or PRTC-m for different times in Panc-1 cells. (B) Immunoblot of CREPT following 24 h incubation with different concentrations of PRTC or PRTC-m in AsPc-1 cells. (C) Immunoblot of CREPT following 24 h incubation with different concentrations of PRTC or PRTC-m in MIA PaCa-2 cells. (D) Immunofluorescence visualization of Panc-1 cells after treatment with PRTC for 1.5 h, 6 h and 12 h. Scale bars, 20  $\mu$ m.

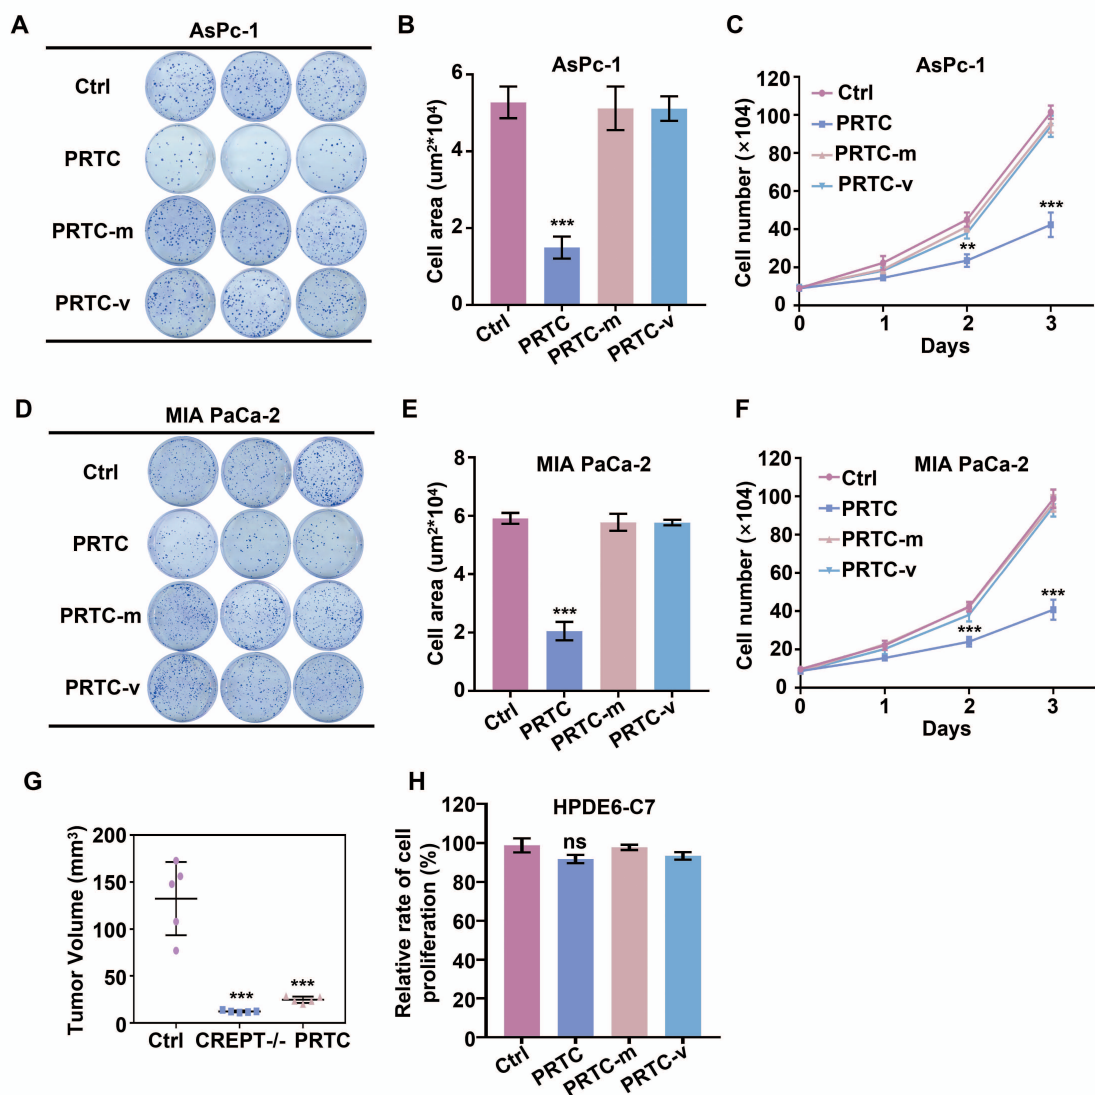

**Figure S4. CREPT degradation by PRTC treatment inhibits cell proliferation and tumorigenesis in AsPc-1 and MIA PaCa-2 cells. (A-B)** Colony formation of AsPc-1 respectively treated with deionized H<sub>2</sub>O (Ctrl), 10 μM PRTC, 10 μM PRTC-m and 10 μM PRTC-v. Cells were seeded into 6-well plates (500 cells per well) and cultured for 8 days. **(C)** Cell proliferation assay of AsPc-1 cells treated with deionized water (Ctrl), 10 μM PRTC, 10 μM PRTC-m and 10 μM PRTC-v. **(D-E)** Colony formation of MIA PaCa-2 respectively treated with deionized H<sub>2</sub>O (Ctrl), 10 μM PRTC, PRTC-m and PRTC-v. **(F)** Cell proliferation assay of MIA PaCa-2 cells treated with deionized H<sub>2</sub>O (Ctrl), 10 μM PRTC, PRTC-m and PRTC-v. **(G)** Tumor volumes of xenograft tumors, which were measured by calipers.  $V = (a \times b^2)/2$  ( $V$  is volume,  $a$  is the length of the tumor,  $b$  is the width of the tumor). **(H)** Cell proliferation assay of HPDE6-C7 cells. PRTC failed to influence the cell proliferation of HPDE6-C7 cells. HPDE6-C7 is a normal pancreatic epithelial cell line.
